# Supplementary material
Source: publisher site journal article supplement (https://www.degruyterbrill.com/publication/isbn/9783110316094/downloadAsset/9783110316094_Inhaltsverzeichnis.pdf)
Supplement: Supplementary file 1 [file 9783110316094_Inhaltsverzeichnis.pdf]

# Inhaltsverzeichnis

Vorwort zur 6. Auflage — **V**

Vorwort zur 1. Auflage — **VII**

Autoren- und Inhaltsübersicht — **IX**

Abkürzungsverzeichnis — **XXI**

## Erster Abschnitt

### Begriff, Geschichte und Rechtsquellen des Völkerrechts

Vorbemerkung — **5**

- I. Begriff und Geltung des Völkerrechts — **5**
  - 1. Begriff und Besonderheiten des Völkerrechts — **5**
    - a) Ansatzpunkte und Probleme der Begriffsbestimmung — **5**
    - b) Begriffsgeschichte und Völkerrechtsentwicklung — **7**
    - c) Expansion des Völkerrechts — **10**
    - d) Kombinationsdefinition des Völkerrechts — **13**
    - e) Abgrenzung zu anderen Rechtsgebieten — **15**
    - f) Völkerrecht und Europarecht — **17**
    - g) Besonderheiten des Völkerrechts — **19**
  - 2. Geltung, Grundregeln und Einheit des Völkerrechts — **23**
    - a) Die Frage der Geltung — **23**
    - b) Die Grundregeln des Völkerrechts — **26**
    - c) Die Einheit der Völkerrechtsordnung — **29**
- II. Völkerrechtsgeschichte und Völkerrechtswissenschaft — **33**
  - 1. Geschichte und Geschichtlichkeit des Völkerrechts — **33**
  - 2. Völkerrechtswissenschaft — **41**
- III. Die Rechtsquellen des Völkerrechts — **42**
  - 1. In Art 38 IGH-Statut genannte Rechtsquellen und Erkenntnis-  
mittel — **42**
    - a) Internationale Übereinkünfte (das Recht der Verträge) — **42**
    - b) Völkergewohnheitsrecht — **51**
    - c) Allgemeine Rechtsgrundsätze — **54**
    - d) Richterliche Entscheidungen, Lehrmeinung — **56**
  - 2. Entwicklungen außerhalb von Art 38 IGH-Statut — **56**
  - 3. Rangverhältnis und Kodifikation der Rechtsquellen — **58**

## Zweiter Abschnitt

### Völkerrecht und staatliches Recht

- I. Einführung in die Grundlagen — **66**
- II. Verfassungsrechtliche Grundentscheidungen für die Stellung Deutschlands in der  
internationalen Ordnung — **69**
  - 1. Das Bekenntnis zu Frieden und Menschenrechten — **69**

2. Die „Offenheit“ und die „Völkerrechtsfreundlichkeit“ — **72**
3. Die Integrationsorientierung — **73**
- III. Das Verhältnis des Völkerrechts zur staatlichen Rechtsordnung: Grundbegriffe und Grundpositionen — **77**
  1. Der Theorienstreit — **77**
  2. Die Mechanismen — **80**
  3. Geltung und Anwendbarkeit — **81**
  4. Völkerrechtliche Rechtsfolgen mangelnder Umsetzung — **81**
- IV. Völkerrecht und deutsches Recht — **82**
  1. Zur Einführung: Das Verhältnis von Völkerrecht und staatlichem Recht nach den Rechtsordnungen einzelner Staaten — **82**
  2. Die völkerrechtlichen Verträge — **89**
    - a) Überblick zu den grundgesetzlichen Vorgaben — **89**
    - b) Bund und Länder als Parteien völkerrechtlicher Verträge und als Mitwirkende beim Vertragsschluss — **90**
    - c) Repräsentation nach außen: Die Befugnisse des Bundespräsidenten — **93**
    - d) Die Rolle der Bundesregierung — **95**
    - e) Das Erfordernis der Mitwirkung von Bundestag und Bundesrat — **98**
    - f) Die Form des Bundesgesetzes — **104**
    - g) Der Rang und die Wirkung völkerrechtlicher Verträge im deutschen Recht — **106**
    - h) Die europäischen Gründungsverträge im deutschen Recht — **108**
    - i) Die Übertragung von Hoheitsrechten im Übrigen — **112**
  3. Das Völkergewohnheitsrecht — **113**
    - a) Völkergewohnheitsrecht und „allgemeine Regeln des Völkerrechts“ — **113**
    - b) Der Rang und die Wirkung gewohnheitsrechtlich geltender allgemeiner Regeln des Völkerrechts im deutschen Recht — **117**
    - c) Die Normverifikation durch das Bundesverfassungsgericht — **121**
  4. Allgemeine Rechtsgrundsätze — **122**
  5. Recht Internationaler Organisationen — **122**
- V. Bilanz: Völkerrecht als Maßstab deutscher Staatsgewalt — **125**
  1. Gesetzgebung — **125**
  2. Regierung und Verwaltung — **126**
  3. Gerichte — **128**

### **Dritter Abschnitt**

#### **Der Staat und der Einzelne als Völkerrechtssubjekte**

- I. Die Rechtsträger im Völkerrecht, ihre Organe und die Regeln des zwischenstaatlichen Verkehrs — **139**
  1. Rechtsträger und Handelnde im Völkerrecht — **139**
    - a) Entwicklung — **139**
    - b) Einteilung der Völkerrechtssubjekte — **140**
    - c) Internationale Organisationen — **141**
    - d) Der Einzelne — **141**
    - e) Völker — **145**
    - f) Minderheiten — **146**
    - g) Sonstige — **146**
  2. Organe der Völkerrechtssubjekte und Regeln des zwischenstaatlichen Verkehrs — **148**
    - a) Zentrale Organe — **148**

- b) Diplomatische Missionen — 151
  - c) Konsulate — 154
  - d) Sonderbotschafter — 155
  - e) Vertretung bei Internationalen Organisationen — 156
  - f) Diplomatisches Asyl — 156
- II. Der Staat als primäres Völkerrechtssubjekt — 158
  - 1. Der Staat — 158
    - a) Die Elemente des Staates — 158
    - b) Die staatliche Souveränität — 160
    - c) Die Gleichheit der Staaten — 161
  - 2. Das Staatsvolk — 166
    - a) Die Staatsangehörigkeit — 167
    - b) Diplomatischer Schutz — 173
    - c) Das Selbstbestimmungsrecht der Völker — 178
  - 3. Das Staatsgebiet — 180
    - a) Territoriale Souveränität und Gebietshoheit — 180
    - b) Erwerb und Verlust von Staatsgebiet — 181
    - c) Umfang des Staatsgebiets — 183
  - 4. Die Staatsgewalt — 185
    - a) Umfang der Staatsgewalt und Neutralität — 185
    - b) Staatsähnliche Völkerrechtssubjekte — 186
  - 5. Entstehung und Untergang von Staaten — 188
    - a) Entstehung und Untergang von Staaten — 188
    - b) Die völkerrechtliche Anerkennung — 189
    - c) Die neuen Staaten in Mittel- und Osteuropa — 191
  - 6. Die Staatensukzession — 193
    - a) Begriff und Rechtsgrundlage — 193
    - b) Die Nachfolge in völkerrechtliche Verträge — 193
    - c) Die Nachfolge in Staatsvermögen, Staatsarchive, Staatsschulden und Haftungsansprüche — 194
    - d) Staatennachfolge und Staatsangehörigkeit — 196
  - 7. Die Rechtslage Deutschlands in Geschichte und Gegenwart — 197
    - a) Die Teilung Deutschlands — 197
    - b) Die Vereinigung Deutschlands — 199
    - c) Die Regelungen über die Staatennachfolge — 200
- III. Der Einzelne im Völkerrecht — 201
  - 1. Der Menschenrechtsschutz auf universeller Ebene — 201
    - a) Einführung — 201
    - b) Die Allgemeine Erklärung der Menschenrechte — 203
    - c) Die Menschenrechtspakte v 19.12.1966 — 204
    - d) Spezielle Konventionen zum Schutz der Menschenrechte — 205
  - 2. Der Menschenrechtsschutz auf regionaler Ebene — 206
    - a) Der Europarat — 206
    - b) Die Europäische Konvention zum Schutze der Menschenrechte und Grundfreiheiten — 207
    - c) Die Europäische Sozialcharta — 213
    - d) Die Menschenrechte im Rahmen der KSZE/OSZE — 214
    - e) Der Menschenrechtsschutz in Amerika — 215
    - f) Die Menschenrechte in Afrika — 216
    - g) Die Menschenrechte in der Arabischen Liga — 217

3. Das völkerrechtliche Fremdenrecht — **217**
  - a) Einführung — **217**
  - b) Die Einreise von Ausländern — **217**
  - c) Die Rechtsstellung von Ausländern — **218**
  - d) Die Ausweisung von Ausländern — **219**
4. Das Recht auf Asyl — **221**
  - a) Der Begriff des Flüchtlings — **221**
  - b) Das Recht auf Asyl — **223**
  - c) Der Grundsatz des *Non-Refoulement* — **223**
  - d) Maßnahmen im Rahmen des Europarates — **224**
  - e) Flüchtlinge in den EU-Mitgliedstaaten — **225**
5. Die Auslieferung — **229**
  - a) Einführung — **229**
  - b) Grundzüge der Auslieferungsverträge — **230**
  - c) Die political offence exception — **230**
  - d) Auslieferung und EMRK — **230**
  - e) Gewaltames Verbringen in den Gerichtsstaat — **231**
6. Der völkerrechtliche Minderheitenschutz — **231**
  - a) Einführung — **231**
  - b) Der Minderheitenschutz auf universeller Ebene — **233**
  - c) Regionaler Minderheitenschutz — **234**

#### **Vierter Abschnitt**

##### **Die Internationalen und die Supranationalen Organisationen**

- I. Geschichte und Bedeutung der Internationalen Organisationen — **244**
  1. Die Internationalen Organisationen als unverzichtbare Elemente der internationalen Zusammenarbeit — **244**
  2. Die Wurzeln: Von den Friedenskongressen und Verwaltungsunionen zum Völkerbund — **244**
  3. Die Entwicklung nach 1945 — **246**
  4. Definitionen und Abgrenzungen — **248**
  5. Der Einfluss der Internationalen Organisationen auf das Völkerrecht — **250**
- II. Das Recht der Internationalen Organisationen — **254**
  1. Entstehung und Untergang Internationaler Organisationen — **254**
    - a) Der völkerrechtliche Gründungsakt — **254**
    - b) Der Gründungsvertrag als „Verfassung“ der Internationalen Organisationen — **255**
    - c) Auslegung und Änderung des Gründungsvertrags — **256**
    - d) Untergang von Internationalen Organisationen — **260**
    - e) Sukzessionsfragen — **262**
  2. Die Mitgliedschaft in Internationalen Organisationen — **263**
    - a) Erwerb der Mitgliedschaft — **263**
    - b) Mitgliedschaftsrechte und -pflichten — **268**
    - c) Beendigung der Mitgliedschaft — **269**
    - d) Beeinträchtigungen der Mitgliedschaftsrechte — **271**
    - e) Abgestufte Formen der Mitgliedschaft — **273**
    - f) Nichtmitglieder — **274**

3. Die Rechtsstellung Internationaler Organisationen — 275
  - a) Völkerrechtsfähigkeit — 275
  - b) Völkerrechtliche Handlungsfähigkeit — 277
  - c) Immunitäten, Privilegien, Verhältnis zum Sitzstaat — 281
  - d) Innerstaatliche Rechts- und Geschäftsfähigkeit — 283
  - e) Qualifikation des internen Organisationsrechts — 284
4. Die Organe und ihre Willensbildung — 286
  - a) Allgemeine Strukturen — 286
  - b) Die Hauptorgane von UN, Europarat und EU im Vergleich — 288
  - c) Die Hauptorgane der UN — 289
  - d) Wandlungen der Organstrukturen und Zwischen-Organ-Verhältnis — 314
5. Aufgaben und Befugnisse Internationaler Organisationen — 316
  - a) Allgemeines — 316
  - b) Festlegung der Kompetenzausstattung, Prinzip der begrenzten Ermächtigung, ultra vires-Handeln — 317
  - c) Respektierung der inneren Zuständigkeit der Mitgliedstaaten — 319
  - d) Bindung an menschenrechtliche Mindeststandards — 320
  - e) Handlungsinstrumentarium — 322
  - f) Die wichtigsten Aufgabenfelder der UN — 324
6. Die Finanzierung Internationaler Organisationen — 330
  - a) Einnahmen — 330
  - b) Ausgaben und Budgetierung — 334
  - c) Rechnungskontrolle und Sanktionen — 334
- III. Die UN-Familie — 335
  1. Allgemeines — 335
  2. UN mit Haupt- und Nebenorganen — 336
  3. Sonderorganisationen — 336
- IV. Europarat — 340
  1. Allgemeines und Entstehung — 340
  2. Organe — 341
  3. Aufgaben, Grundsätze, Aktivitäten — 342
- V. Europäische Union — 344
  1. Supranationale Organisation — 344
  2. Völkerrechtssubjektivität und völkerrechtliche Handlungsfähigkeit — 345
  3. Unionszuständigkeiten und Grundrechtsschutz — 346
  4. Vertrag von Lissabon und Entwicklungsperspektiven — 348

## **Fünfter Abschnitt**

### **Raum und Umwelt im Völkerrecht**

#### **Vorbemerkung — 359**

- I. Der Raum im Völkerrecht — 359
  1. Die Raumordnung des Völkerrechts im Überblick — 359
    - a) Territoriale Souveränität und Gebietshoheit — 360
    - b) Staatsgebiet und Nichtstaatsgebiet als Grundkategorien — 361
    - c) Nichtstaatsgebiet: Funktionshoheits- und Staatengemeinschaftsräume — 362
  2. Staatsgebiet: Raum territorial radizierter, umfassender Hoheitsgewalt — 365
    - a) Wesen und Grenzen: Gebietshoheit im Rahmen des Völkerrechts — 365
    - b) Erwerb und Verlust von Staatsgebiet — 369

- c) Luftraum: Lufthoheit und Luftfreiheiten — **371**
  - d) Maritimes Aquitorium: Innere Gewässer, Archipelgewässer, Küstenmeer — **374**
    - Innere Gewässer — **376**
    - Archipelgewässer — **378**
    - Küstenmeer — **378**
    - Meerengen — **380**
- 3. Nichtstaatsgebiet (1): Küstenstaatliche Funktionshoheitsräume — **381**
  - a) Wesen und Grenzen: Räume begrenzter Hoheitsbefugnisse — **381**
  - b) Anschlusszone: Raum polizeilicher Kontrollrechte — **382**
  - c) Ausschließliche Wirtschaftszone: Ressourcenorientierter Raum sui generis — **382**
  - d) Festlandsockel: Erforschungs- und Ausbeutungsmonopol aus Küstenlage — **385**
- 4. Nichtstaatsgebiet (2): Globale Staatengemeinschaftsräume — **389**
  - a) Wesen und Grenzen: Gemeinschaftsbezogene Forschungs- und Nutzungsfreiheit — **389**
  - b) Hohe See: Raum rechtlich geordneter Freiheit — **390**
  - c) Meeresboden („Gebiet“): Internationalisiertes Menschheitserbe — **393**
  - d) Weltraum: Kooperationsverpflichtete Freiheit und Gleichheit — **395**
  - e) Antarktis: Eher „Weltpark“ als „Klubraum“ — **400**
- II. Die Umwelt im Völkerrecht — **403**
  - 1. Das Völkerrecht des Umweltschutzes im Überblick — **403**
  - 2. Die Entwicklung des Umweltvölkerrechts — **404**
    - a) Die Ausgangspunkte: Nachbarrecht und Artenschutzabkommen — **405**
    - b) Die großen Umweltkonferenzen — **407**
  - 3. Allgemeine Prinzipien des Umweltvölkerrechts — **410**
    - a) Das Trail Smelter-Prinzip und der Präventionsgrundsatz — **411**
    - b) Der Grundsatz der ausgewogenen Mitnutzung grenzübergreifender Ressourcen — **414**
    - c) Das Vorsorge- und das Verursacherprinzip — **414**
    - d) Das Leitbild der nachhaltigen Entwicklung — **416**
  - 4. Umweltschutz und Menschenrechte — **418**
  - 5. Bereichsspezifische Instrumente des Umweltvölkerrechts — **419**
    - a) Der Schutz der Binnengewässer — **420**
    - b) Der Schutz des Meeres — **425**
    - c) Der Schutz von Luft, Klima und Ozonschicht — **430**
      - Schutz von Luft und Atmosphäre — **430**
      - Schutz der Ozonschicht — **434**
    - d) Der Arten- und Biodiversitätsschutz — **435**
    - e) Der Schutz vor Abfällen und Schadstoffen — **437**

## **Sechster Abschnitt**

### **Wirtschaft und Kultur**

- I. Die Wirtschaft im Völkerrecht — **445**
  - 1. Das Völkerrecht der wirtschaftlichen Zusammenarbeit im Überblick — **445**
    - a) Internationales Wirtschaftsrecht — **448**
    - b) Weltwirtschaftsordnung — **449**
  - 2. Standards des internationalen Wirtschaftsrechts — **451**
    - a) Grundsatz der Nichtdiskriminierung — **451**

- b) Meistbegünstigungsgrundsatz — 453
  - c) Grundsatz der Inländergleichbehandlung — 454
  - d) Reziprozität, Fairness — 456
  - e) Recht auf Entwicklung, Nachhaltigkeit — 458
  - f) Rationalität, Transparenz, Good Governance — 462
- 3. Schutz fremden Eigentums und Status Multinationaler Unternehmen — 465
  - a) Schutz von Auslandsinvestitionen — 465
  - b) Multinationale Unternehmen — 470
- 4. Welthandelsordnung — 474
  - a) Instrumente des freien Welthandels: GATT und WTO — 474
    - GATT/WTO und die Welthandelsprinzipien — 475
    - Der WTO-Vertragskomplex — 477
    - Dumping/Anti-Dumping — 478
    - Subventionsproblem im GATT — 479
    - Ausnahmeklauseln — 481
    - GATT/WTO und Umweltschutz — 483
    - GATT/WTO und Menschenrechte — 485
    - GATS und TRIPS — 486
  - b) Handelsbezogene Investitionsmaßnahmen — 487
  - c) Instrumente regionaler wirtschaftlicher Integration — 488
  - d) Weitere handelsbezogene Instrumente — 490
- 5. Internationales Steuerrecht — 491
- 6. Das Völkerrecht der wirtschaftlichen Entwicklung — 493
  - a) Grundlagen und Entwicklung — 493
  - b) Internationaler Währungsfonds und Weltbankgruppe — 493
  - c) Rohstoffabkommen und Cotonou-Abkommen — 497
- II. Die Kultur im Völkerrecht — 499
  - 1. Kulturgüterrecht im Überblick — 499
  - 2. Informationsfreiheit und Kulturordnung — 501
  - 3. Kulturelle Belange als Schranke der Waren- und Dienstleistungsfreiheiten — 502
  - 4. Recht auf Sprache — 504
  - 5. Kulturgüter und ihr Schutz — 505
    - a) Definition des Kulturguts — 508
    - b) Rechtsträger von Kulturgütern — 509
    - c) Kulturgüter in bewaffneten Konflikten — 512
    - d) Regelung für Friedenszeiten — 514
    - e) Rückführung von Kulturgut — 518
    - f) Kulturgüterschutz im Meer — 519
    - g) Archivgut, Archäologie, Architektur — 520

## Siebenter Abschnitt

### Verantwortlichkeit, Völkerstrafrecht, Streitbeilegung und Sanktionen

- I. Völkerrechtsverletzungen als Hauptthema des Abschnitts — 527
- II. Internationale Verantwortlichkeit — 527
  - 1. Begriff und Terminologie — 527
  - 2. Grundlagen und Konzept der Staatenverantwortlichkeit — 528
    - a) Rechtliches Fundament — 528

- b) Umriss — **529**
    - c) Ansätze zur Ausweitung des Konzepts — **531**
      - Erga omnes-Pflichten — **531**
      - Haftung für risikobehaftete Tätigkeiten — **532**
  - 3. Einzelfragen — **534**
    - a) Zurechnungsprobleme der Staatenverantwortlichkeit — **534**
    - b) Ausschluss der Staatenverantwortlichkeit — **536**
    - c) Rechtsfolgen der Staatenverantwortlichkeit — **537**
  - 4. Die Verantwortlichkeit Internationaler Organisationen — **538**
    - a) Praktische Bedeutung — **538**
    - b) Einschlägige Regeln — **539**
- III. Völkerstrafrecht — **540**
  - 1. Das Konzept — **540**
    - a) Begriff und Kriterien — **540**
    - b) Inhaltlicher Bezug zu Frieden und Sicherheit der Menschheit — **542**
  - 2. Grundelemente der Normierung — **545**
    - a) Abgrenzung in Bezug auf die staatliche Strafgewalt — **545**
    - b) Ausgestaltung der Tatbestände und der Strafbarkeitsvoraussetzungen — **546**
    - c) Allgemeine Strafrechtsprinzipien und Strafsanktionen — **548**
    - d) Die Strafgewalt internationaler Gerichte, insbesondere des IStGH — **548**
    - e) Strafverfahren — **549**
  - 3. Bilanz — **550**
- IV. Streitbeilegung — **550**
  - 1. Die Pflicht zur friedlichen Streitbeilegung — **550**
    - a) Rechtliches Fundament — **550**
    - b) Rechtssystematischer Standort — **551**
    - c) Gegenstand — **552**
    - d) Inhalt und Grenzen — **553**
  - 2. Die Mittel der Streitbeilegung im Überblick — **553**
  - 3. Diplomatische Verfahren — **554**
    - a) Verhandlungen und Konsultationen — **554**
    - b) Verfahren mit Drittbeteiligung — **555**
  - 4. Streiterledigung durch Schiedsgerichte — **556**
    - a) Allgemeine Kennzeichnung — **556**
    - b) Erscheinungsformen — **557**
    - c) Einzelfragen des schiedsgerichtlichen Verfahrens — **558**
    - d) Praktische Bedeutung — **558**
  - 5. Der Internationale Gerichtshof — **559**
    - a) Grundlagen — **559**
    - b) Zuständigkeit — **560**
    - c) Entscheidungsmaßstab — **562**
    - d) Organisation — **562**
    - e) Grundzüge des Streitverfahrens — **564**
    - f) Bilanz — **565**
- V. Sanktionen — **566**
  - 1. Allgemeine Kennzeichnung — **566**
    - a) Begriff und Abgrenzung — **566**
    - b) Kritik am Sanktionskonzept — **566**
  - 2. Erscheinungsformen — **567**



- 3. Einzelprobleme — 569
  - a) Die Friedensrepressalie — 569
  - b) Wirtschaftssanktionen — 571

## **Achter Abschnitt**

### **Friedenssicherung und Kriegsrecht**

#### **Vorbemerkung — 578**

- I. Völkerrechtliche Verhinderung von Gewalt (*ius contra bellum*) — 578
  - 1. Das rechtliche Verbot von Gewalt — 578
    - a) Entwicklung — 578
    - b) Verbotene Gewalt — 581
    - c) Rechtfertigungsgründe für Gewalt — 587
      - Selbstverteidigung — 587
      - Ausübung des Selbstbestimmungsrechts — 590
      - Schutz eigener Staatsangehöriger — 591
      - Humanitäre Intervention — 591
      - Intervention auf Einladung — 594
      - Entscheidungen Internationaler Organisationen — 594
    - d) Rechtliche Konsequenzen einer Verletzung und Durchsetzung des Gewaltverbots — 596
    - e) Funktion und Bedeutung des Gewaltverbots — 598
  - 2. Rahmenbedingungen des Gewaltverbots — 599
    - a) Friedliche Streitbeilegung und friedlicher Wandel — 599
    - b) Das System der kollektiven Sicherheit — 600
      - Entwicklung — 600
      - Die Kompetenzen des Sicherheitsrats — 606
    - c) Rüstungskontrolle und Abrüstung — 613
      - Entwicklung — 613
      - Rüstungskontrolle und Abrüstung im System gegenseitiger Abschreckung — 613
      - Rüstungskontrolle und Abrüstung nach dem Ende des Kalten Krieges — 615
- II. Völkerrechtliche Eingrenzung von Gewalt – Das Recht bewaffneter Konflikte (*ius in bello*) — 618
  - 1. Grundlage und Entwicklung — 618
  - 2. Die Beziehungen zwischen den Konfliktparteien — 622
    - a) Der Anwendungsbereich des völkerrechtlichen Kriegsrechts – der internationale bewaffnete Konflikt — 622
    - b) Allgemeine Grundsätze und Landkriegsrecht — 623
      - Die Grundregel — 623
      - Zulässige Mittel der Schädigung des Gegners: Verbot „überflüssiger“ Leiden — 624
      - Schutz der Zivilbevölkerung — 624
      - Besonders geschützte Objekte — 628
      - Das Perfidieverbot — 629
      - Waffenverbote und Verbote von Kampfmethoden — 629
      - Geschützte Personen — 633
    - c) Seekrieg — 637
    - d) Luftkrieg — 639
    - e) Wirtschaftskrieg — 640

- f) Durchsetzung des *ius in bello* — **640**
- 3. Konfliktparteien und dritte Staaten (Neutralitätsrecht) — **647**
  - a) Grundlagen — **647**
  - b) Unverletzlichkeit des neutralen Gebiets — **650**
  - c) Neutralitätspflichten der Nichtteilnehmer — **651**
  - d) Landkrieg — **652**
  - e) Seekrieg — **652**
    - Kriegsschiffe in neutralen Gewässern — **652**
    - Die Kontrolle des neutralen Seehandels — **652**
    - Schutz der neutralen Handelsschifffahrt — **653**
  - f) Luftkrieg — **654**
- 4. Der nichtinternationale bewaffnete Konflikt — **655**
- 5. Die Internationalisierung nichtinternationaler Konflikte — **660**
- III. Rechtliche Steuerung des Wegs vom bewaffneten Konflikt zur friedlichen Normalität (*ius post bellum*) — **661**

**Sachverzeichnis — 663**
